# Supplementary material for: Low-temperature synthesis of porous hollow structured Cu2O for photocatalytic activity and gas sensor application
Source: Royal Society of Chemistry journal article supplement (doi:10.1039/c3ra42192a), 2013-01-01
Supplement: c3ra42192a.pdf [file c3ra42192a.pdf]

## Supporting information

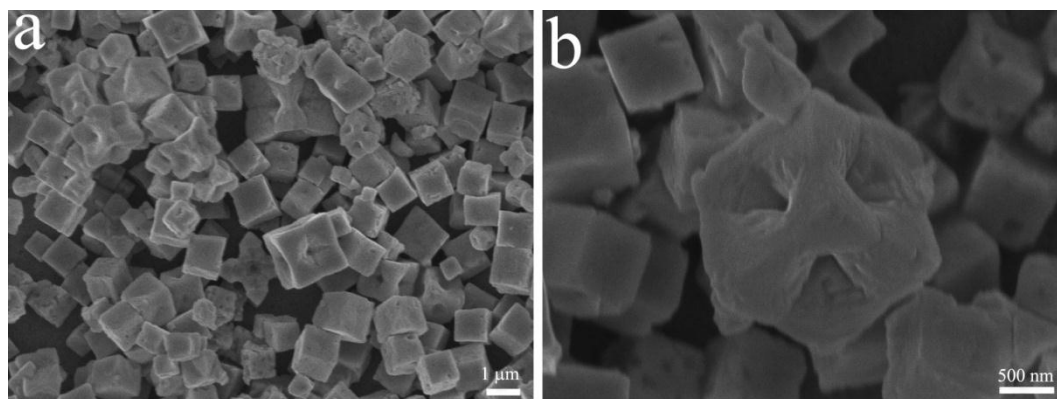

**Fig. S1** FESEM images of products synthesized without CTAB.

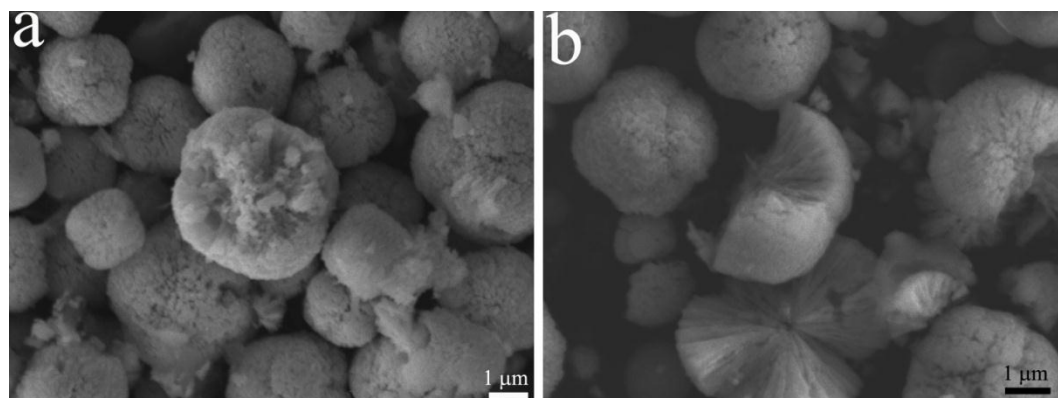

**Fig. S2** FESEM images of the samples synthesized at 80 °C using 1.2 mM CTAB at different reaction times: (a) 1 h; (b) 4 h.
